# Supplementary material for: From Infrared Spectra to Macroscopic Mechanical Properties of sH Gas Hydrates through Atomistic Calculations
Source: Molecules. 2020 Nov 27;25(23):5568. doi: 10.3390/molecules25235568 (PMC7729739; doi:10.3390/molecules25235568)
Supplement: Supplementary file 1 [file molecules-25-05568-s001.pdf]

# **From Infrared Spectra to Macroscopic Mechanical Properties of sH Gas Hydrates through Atomistic Calculations**

## **Supporting Information**

Authors: Shaden M. Daghash<sup>a</sup>, Phillip Servio<sup>a</sup>, Alejandro D. Rey<sup>a\*</sup>

<sup>a</sup> *Department of Chemical Engineering, McGill University, Montréal, Quebec H3A 0C5, Canada*

\*Corresponding author email: [alejandro.rey@mcgill.ca](mailto:alejandro.rey@mcgill.ca)

**Content:**

This file contains schematics of the main vibrational modes of water molecules and some guest vibrations in sH gas hydrates with average IR frequency values at 0 K and 0 GPa (unless otherwise stated). Molecules visualizations were made using VESTA\* software.

**Color code:**

- Oxygen atom: red
- Hydrogen atom: white
- Carbon atom: brown
- Vibrations happening at the same time have the same color (black or blue).

\* K. Momma and F. Izumi, "VESTA 3 for three-dimensional visualization of crystal, volumetric and morphology data," J. Appl. Crystallogr., 44, 1272-1276 (2011).

## Main vibrational modes of water molecules in sH gas hydrates

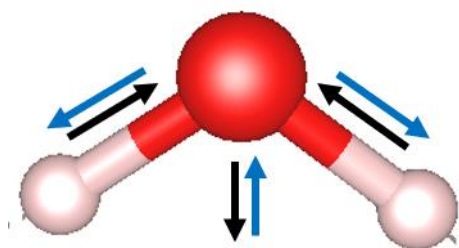

OH symmetric stretch

$\sim 3062 \text{ cm}^{-1}$

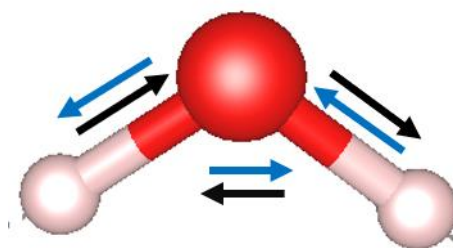

OH asymmetric stretch

$\sim 3268 \text{ cm}^{-1}$

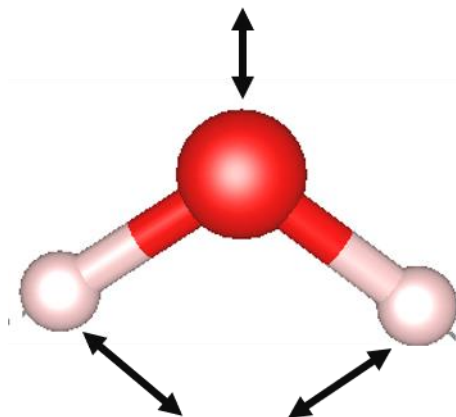

H<sub>2</sub>O bending

$\sim 1633 \text{ cm}^{-1}$

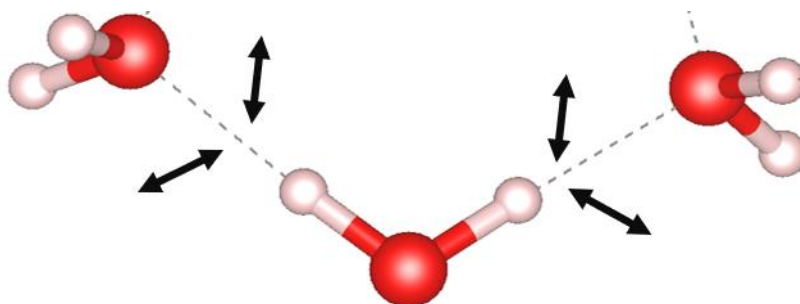

Hydrogen bond stretching

$\sim 192 \text{ cm}^{-1}$

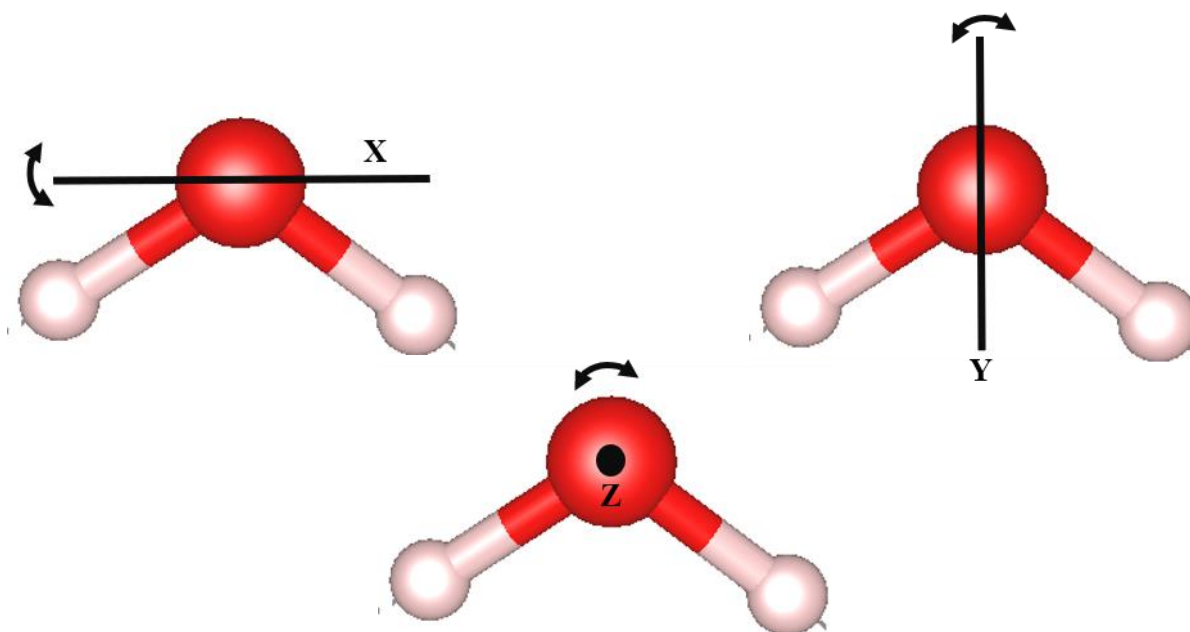

**H<sub>2</sub>O libration modes**  
 $\sim 648 \text{ cm}^{-1}, 918 \text{ cm}^{-1}$

---

### Selected vibrational modes of guest molecules encapsulated inside sH gas hydrates

#### Carbon Dioxide

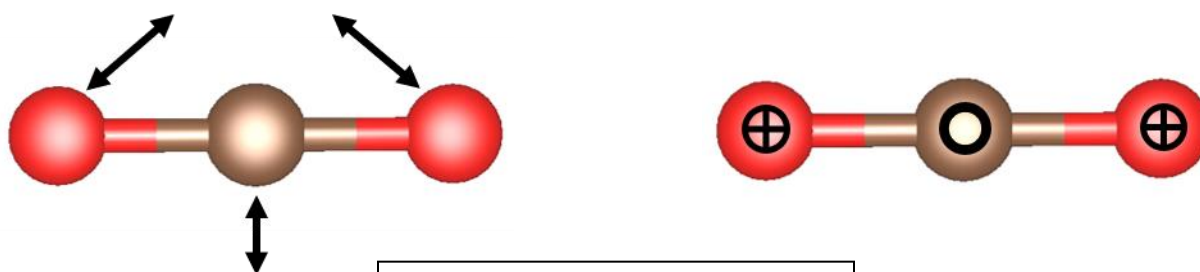

**CO<sub>2</sub> bending\***  
 $\sim 610 \text{ cm}^{-1}$

\* Observed at pressures  $\geq 1 \text{ GPa}$  in sH gas hydrate

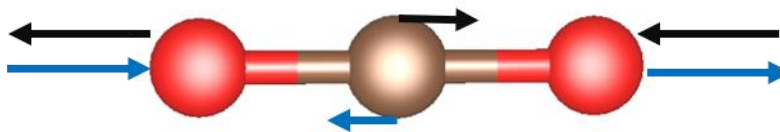

**C=O asymmetric stretch**

**$\sim 2284 \text{ cm}^{-1}$**

## Methane

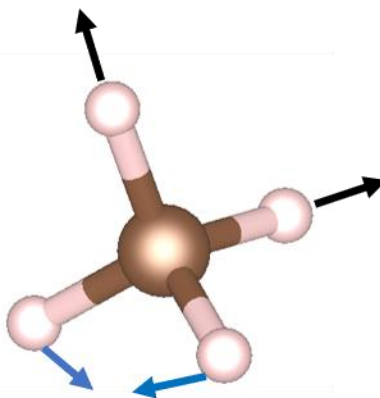

**CH<sub>4</sub> asymmetric bending**

**$\sim 1252 \text{ cm}^{-1}$**

## Neohexane

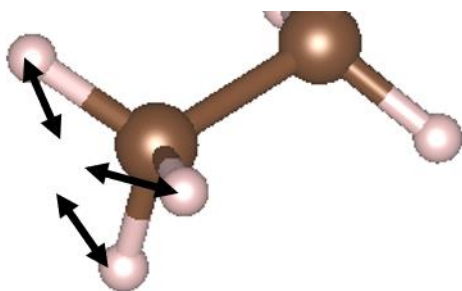

**CH<sub>3</sub> symmetric bending**

**$\sim 1345 \text{ cm}^{-1}$**

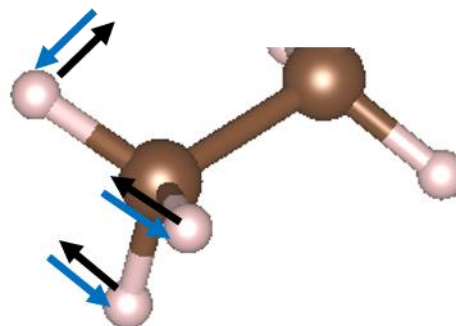

**CH<sub>3</sub> asymmetric bending**

**$\sim 1432 \text{ cm}^{-1}$**
